# Supplementary material for: Molecular basis of synaptic specificity by immunoglobulin superfamily receptors in Drosophila
Source: eLife journal article supplement (doi:10.7554/elife.41028), 2019-01-28
Supplement: supp [file elife-41028-supp-v1.zip]

Archive with 16 entries (16 files):
- elife_poa_e41028_Figure_3_figure_supplement_1.ai
- elife_poa_e41028_Figure_6_figure_supplement_1.ai
- elife_poa_e41028_Figure_4_figure_supplement_2.ai
- elife_poa_e41028_Figure_4_figure_supplement_4.ai
- elife_poa_e41028_Figure_6_figure_supplement_2.ai
- elife_poa_e41028_Figure_1_figure_supplement_1.ai
- elife_poa_e41028_Figure_8_figure_supplement_1.psd
- elife_poa_e41028_Figure_4_figure_supplement_3.ai
- elife_poa_e41028_Figure_8_source_data_1.docx
- elife_poa_e41028_Figure_7_figure_supplement_1.psd
- elife_poa_e41028_Figure_8_source_data_2.docx
- elife_poa_e41028_Figure_7_source_data_2.docx
- elife_poa_e41028_Transparent_Reporting_File.pdf
- elife_poa_e41028_Figure_5_figure_supplement_1.ai
- elife_poa_e41028_Figure_7_source_data_1.docx
- elife_poa_e41028_Figure_4_figure_supplement_1.ai
