# Supplementary material for: Molecular basis of synaptic specificity by immunoglobulin superfamily receptors in Drosophila
Source: eLife journal article supplement (doi:10.7554/elife.41028), 2019-01-28
Supplement: supp [file elife-41028-supp-v1.zip › elife_poa_e41028_Figure_8_source_data_1.docx]

**Figure 8–source data 1. Source data for Figure 8c.**

| Fig. | Genotype | Mean | Std. Dev. | S.E.M. | n (animals / hemisegments) | p-value |
| --- | --- | --- | --- | --- | --- | --- |
| 8c | UAS*-dpr10* | 87.5 | 33.21 | 3.032 | 12/120 | n/a* |
|  | *Mef2-GAL4*>*dpr10* | 24.68 | 43.39 | 4.945 | 11/77 | <0.0001 |
|  | UAS-*dpr10Y103A* | 85.82 | 35.01 | 2.949 | 15/141 | n/a |
|  | *Mef2-GAL4>dpr10Y103A* | 88.68 | 31.99 | 4.394 | 7/53 | NS† |
|  | *DIP-α1-178*/+; UAS-*dpr10* | 60.36 | 49.14 | 4.664 | 17/111 | n/a |
|  | *DIP-α1-178*/+; *Mef2-GAL4*>*dpr10* | 5.882 | 23.62 | 2.025 | 17/136 | <0.0001 |
|  | *DIP-α1-178*/+; UAS-*dpr10Y103A* | 61.67 | 48.82 | 4.457 | 1/120 | n/a |
|  | *DIP-α1-178*/+; *Mef2-GAL4*>*dpr10Y103A* | 46.43 | 50.32 | 6.725 | 7/56 | NS |

* not applicable

† not significant
