# Supplementary material for: Molecular basis of synaptic specificity by immunoglobulin superfamily receptors in Drosophila
Source: eLife journal article supplement (doi:10.7554/elife.41028), 2019-01-28
Supplement: supp [file elife-41028-supp-v2.zip]

**a**

|                                |               | <i>Fold loss of affinity<br/>upon alanine mutagenesis</i> |      |        |         | <i>Residue numbering<br/>for Dpr1</i> |
|--------------------------------|---------------|-----------------------------------------------------------|------|--------|---------|---------------------------------------|
|                                |               | $K_D$ ( $\mu$ M)                                          | 94   | 95     | 103     | 138                                   |
| <i>Dpr6</i>                    | <b>0.37 *</b> | 0.09                                                      | 13   | ~1,500 | 65      |                                       |
| <i>DIP-<math>\alpha</math></i> |               | 1                                                         | ~680 | ~3,000 | ~30,000 |                                       |
| <i>Dpr11</i>                   | <b>1.22 †</b> | 5.1                                                       | 125  | 3.5    | 3.5     |                                       |
| <i>DIP-<math>\gamma</math></i> |               | 1.9                                                       | 19   | 7.0    | 74      |                                       |
| <i>Dpr1</i>                    | <b>3.99 †</b> | 0.51                                                      | 35   | 75     | 5.6     |                                       |
| <i>DIP-<math>\eta</math></i>   |               | 69                                                        | 73   | 10     | 50      |                                       |

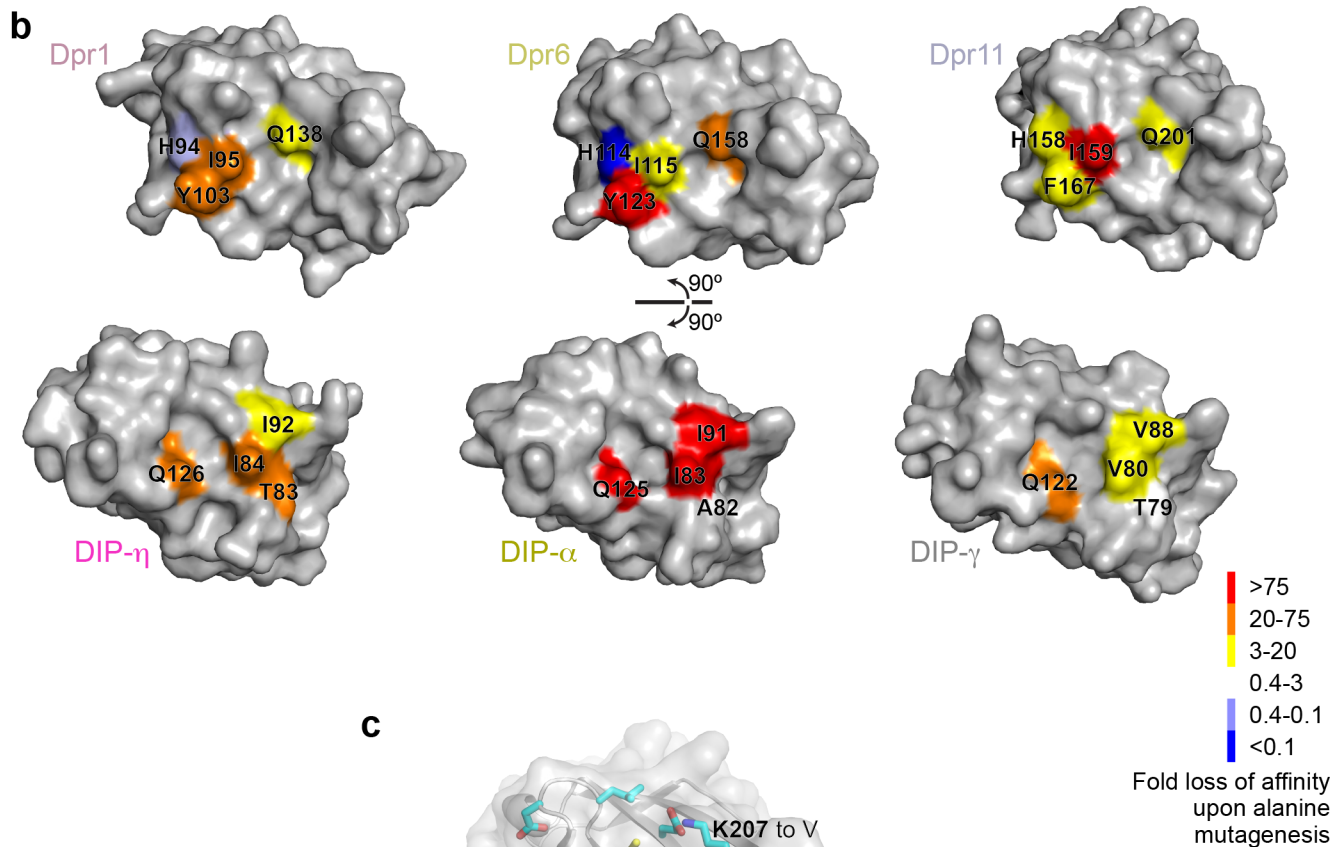

Figure 4 – figure supplement 4
