# Supplementary figures and images for: Molecular basis of synaptic specificity by immunoglobulin superfamily receptors in Drosophila
Source: eLife journal article supplement (doi:10.7554/elife.41028), 2019-01-28

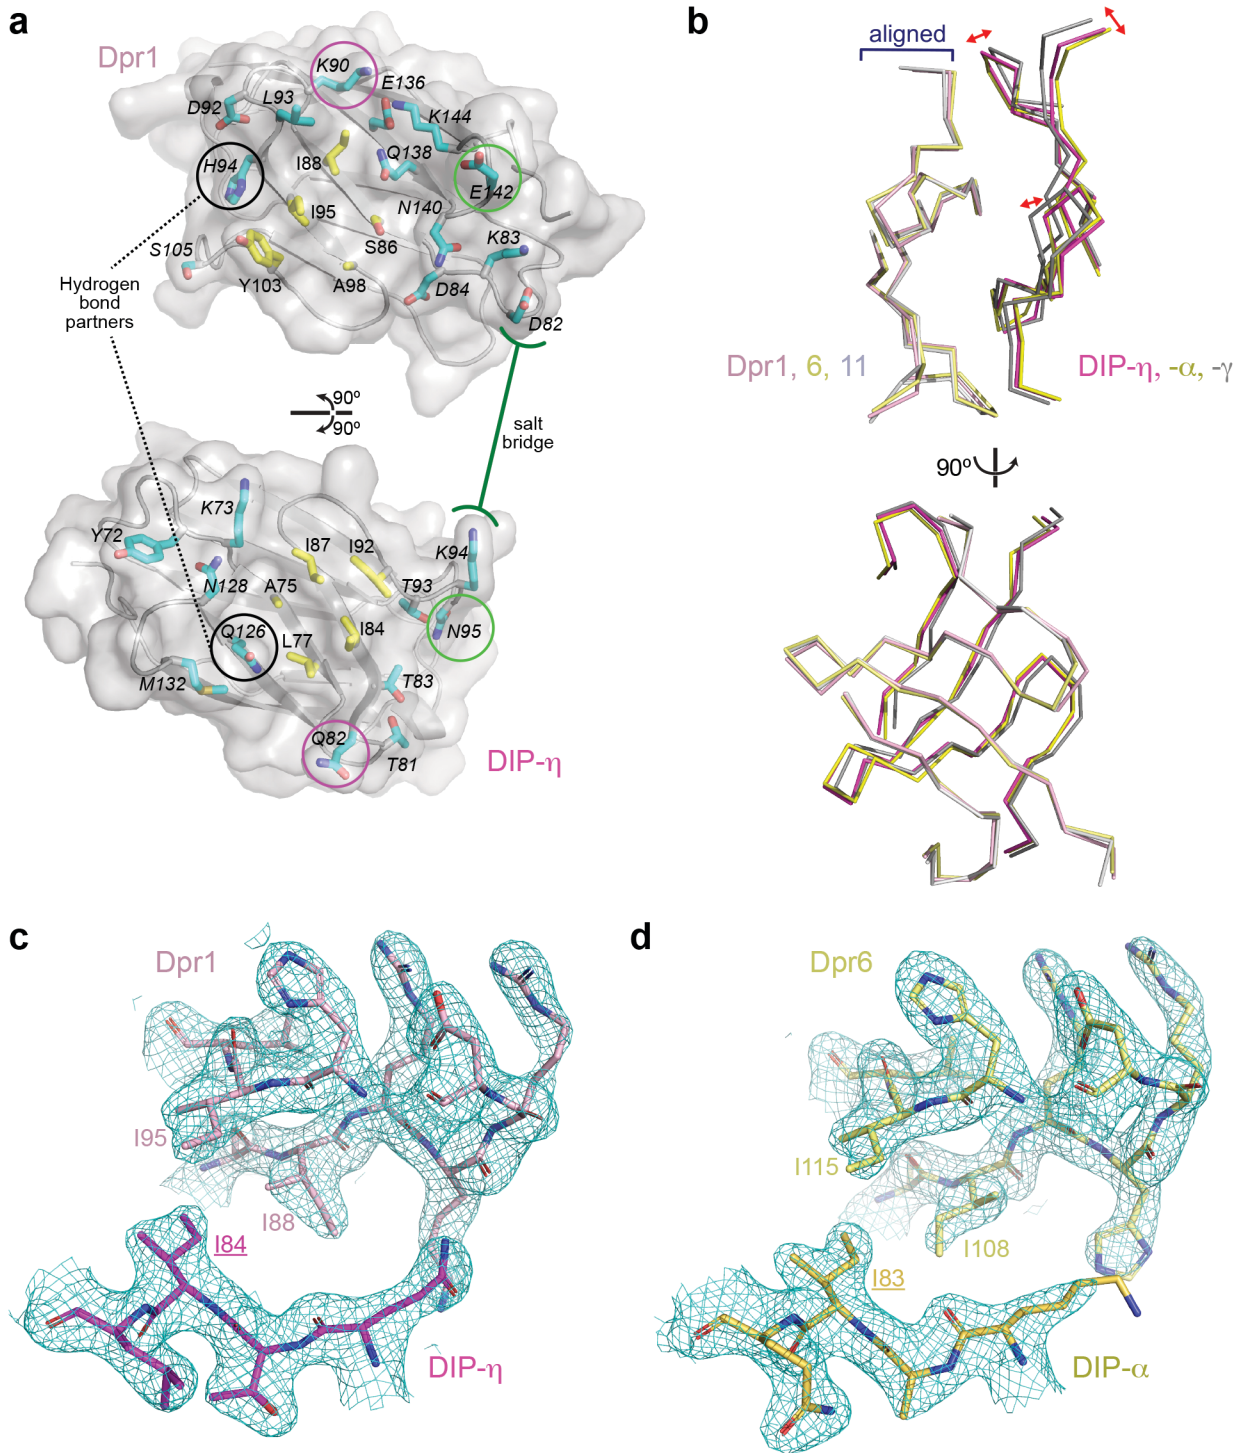

Figure 3 – figure supplement 1

Supplement: supp [file elife-41028-supp-v2.zip]

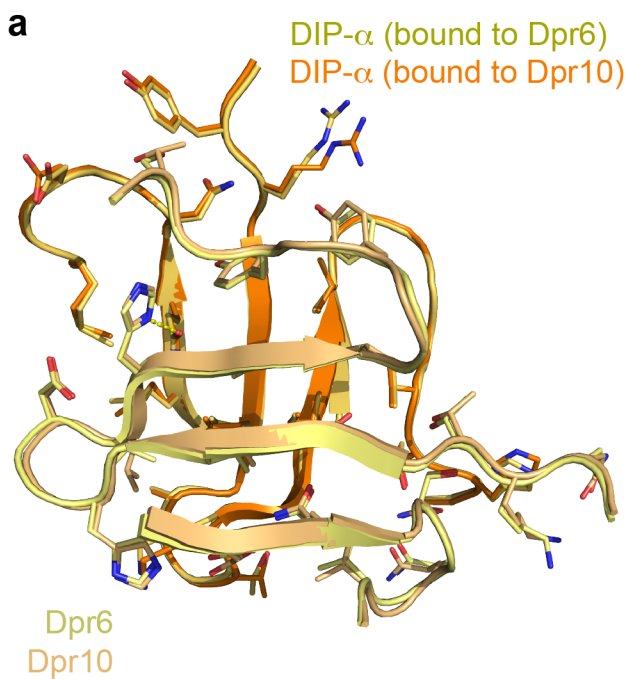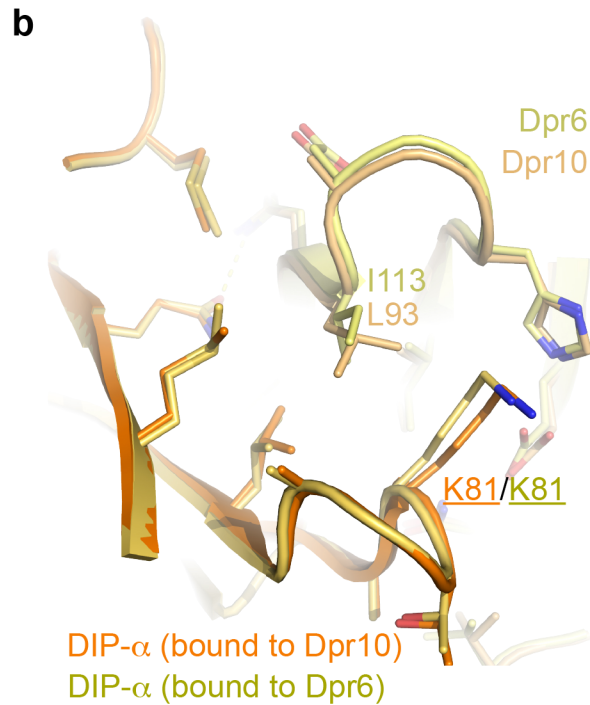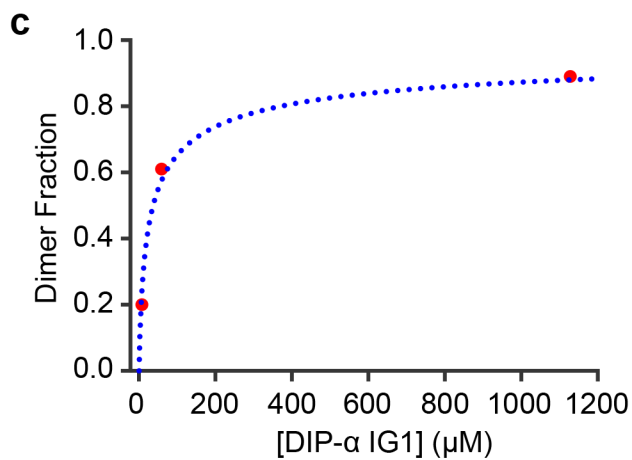

Figure 6 – figure supplement 1

Supplement: supp [file elife-41028-supp-v2.zip]

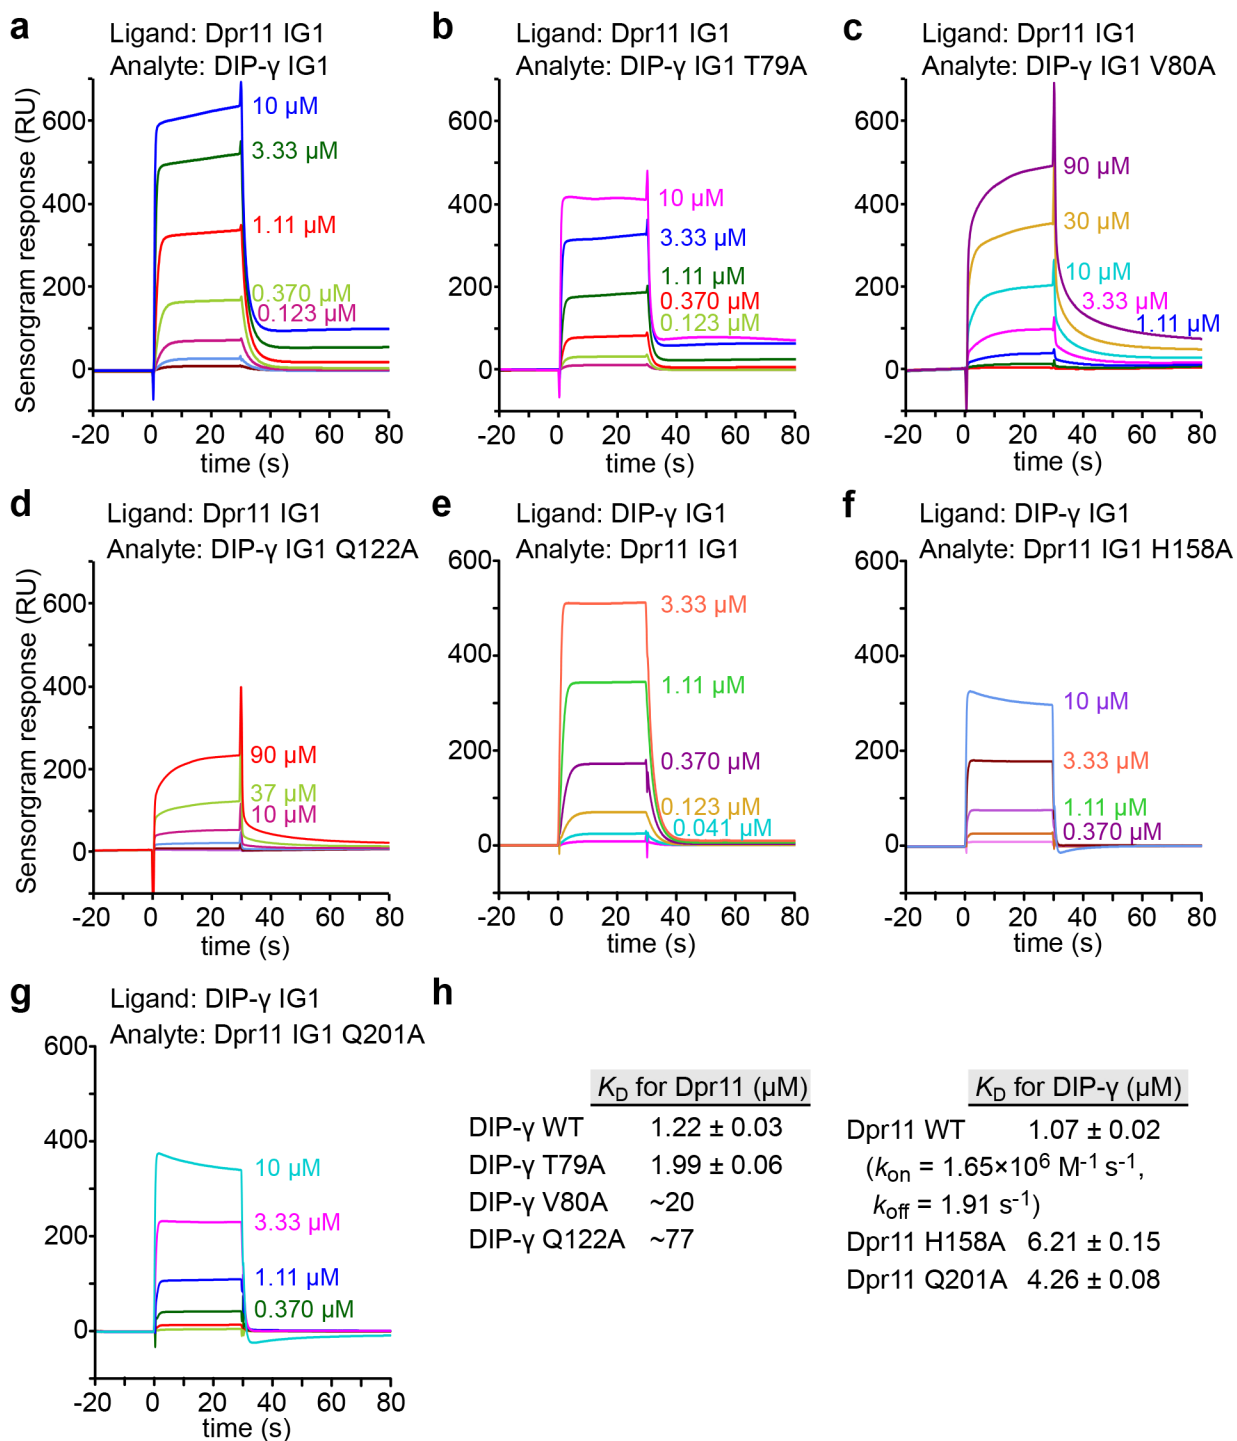

Figure 4 – figure supplement 3

Supplement: supp [file elife-41028-supp-v2.zip]

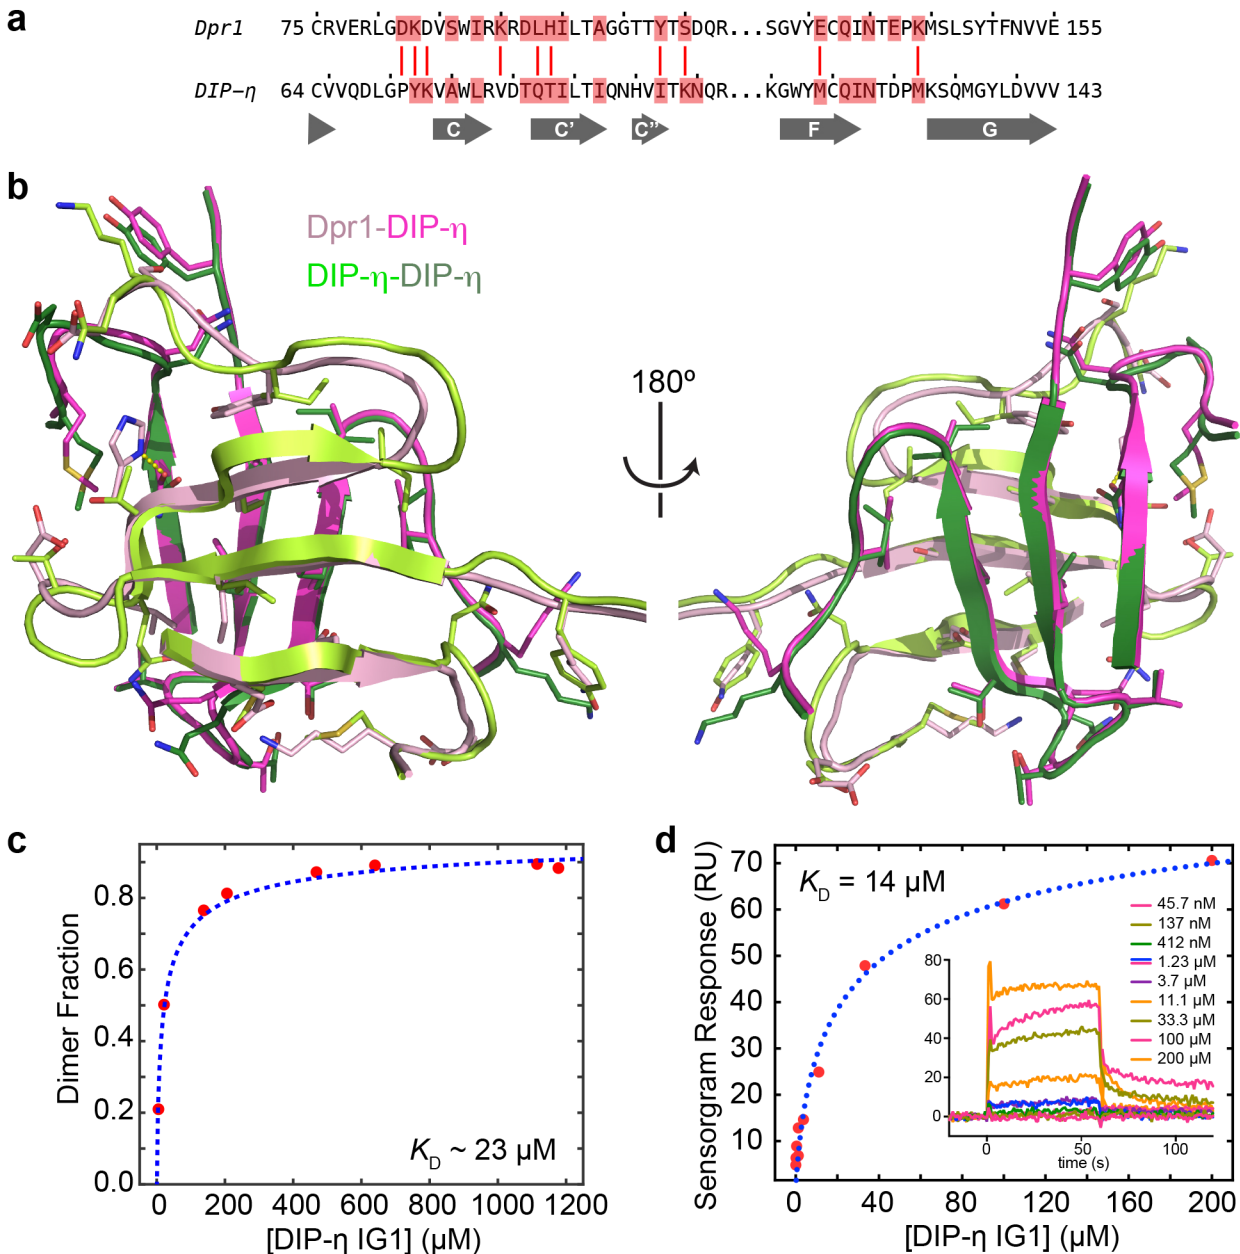

Figure 5 – figure supplement 1

Supplement: supp [file elife-41028-supp-v2.zip]

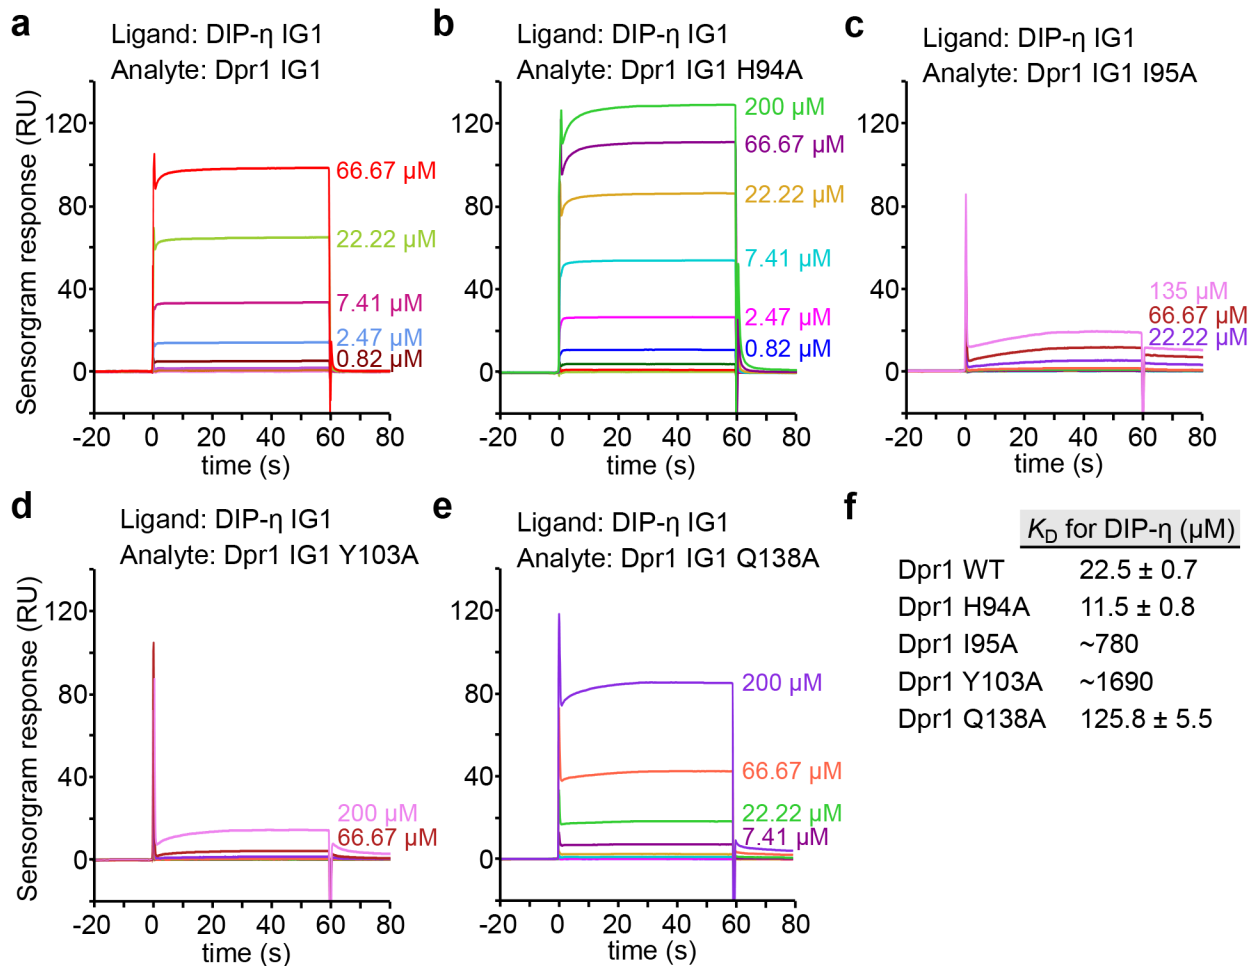

Figure 4 – figure supplement 1

Supplement: supp [file elife-41028-supp-v2.zip]

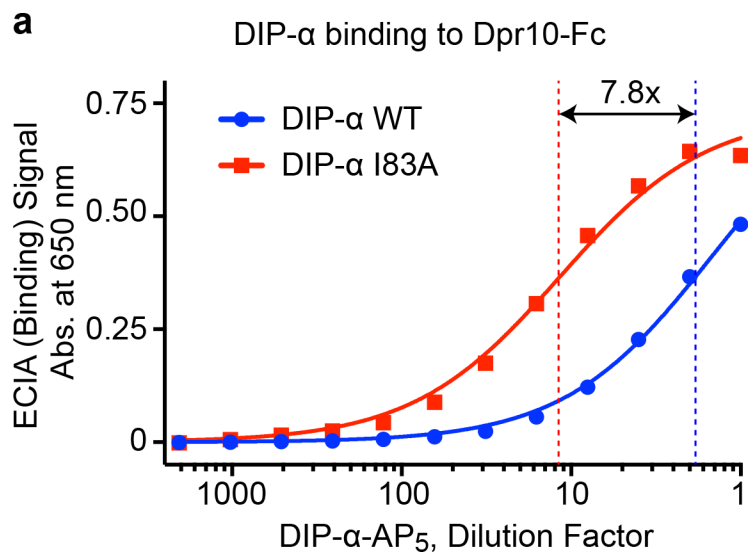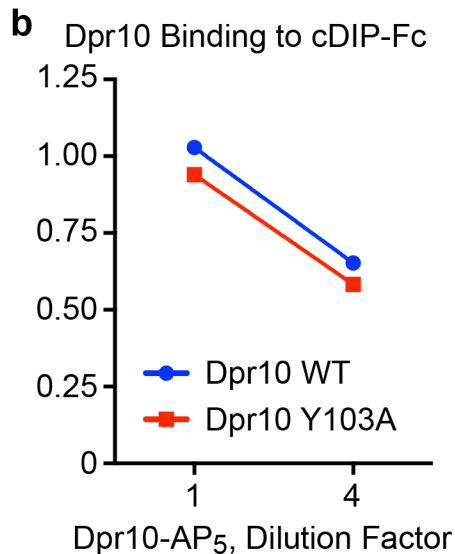

Figure 6 – figure supplement 2

Supplement: supp [file elife-41028-supp-v2.zip]

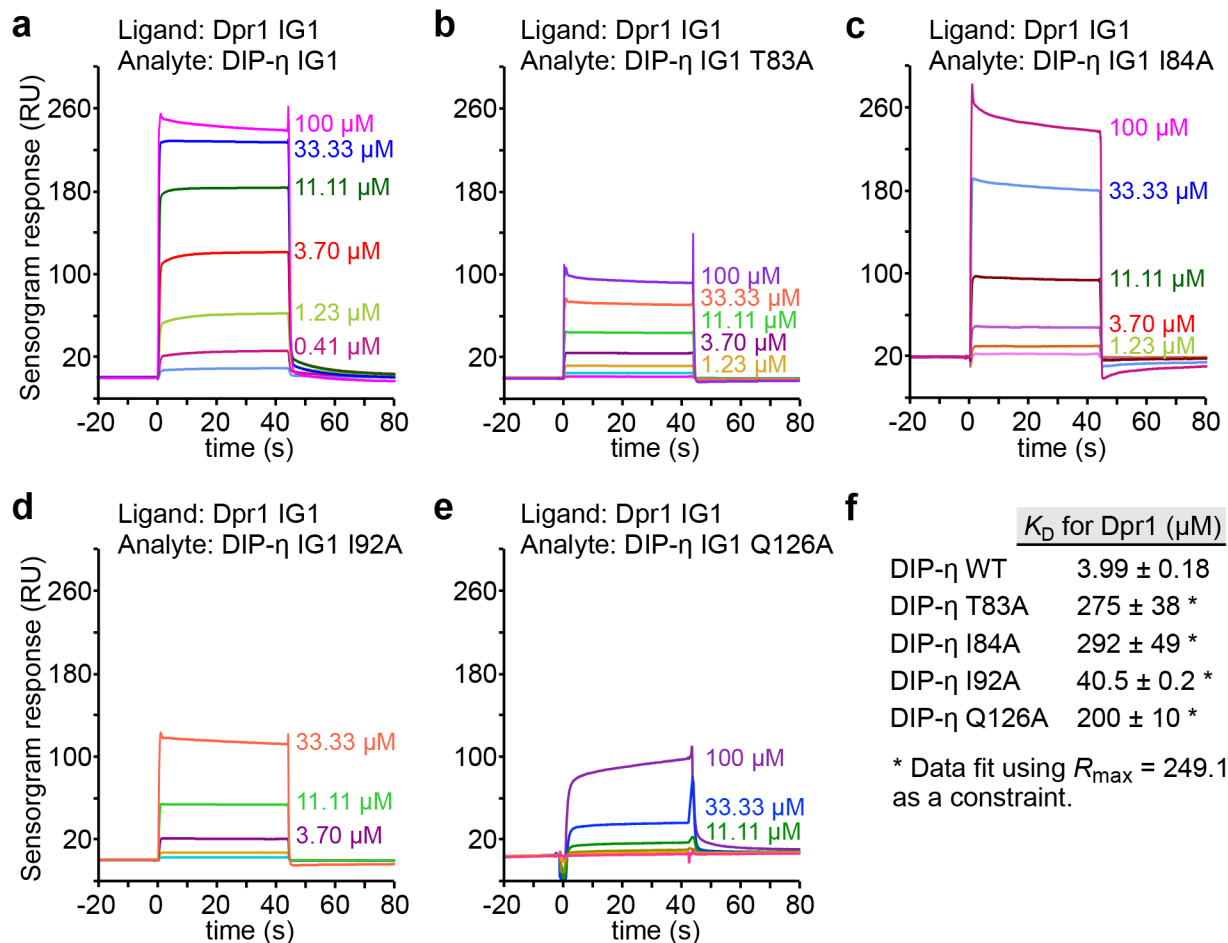

**Figure 4 – figure supplement 2**

Supplement: supp [file elife-41028-supp-v2.zip]

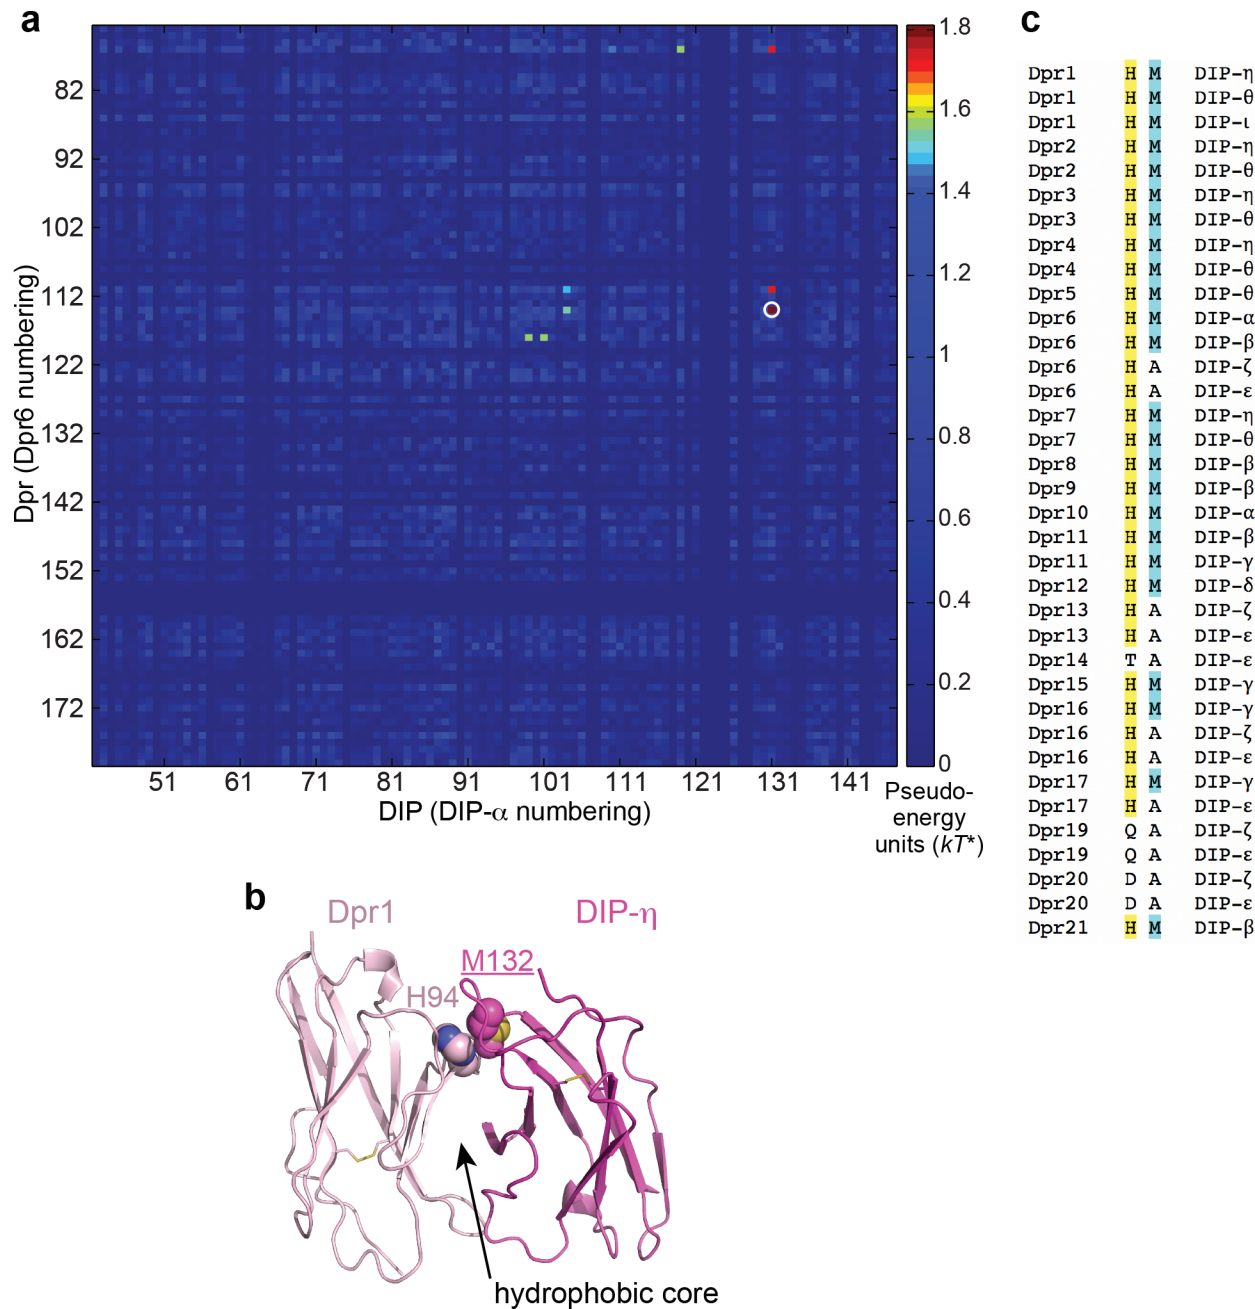

Figure 1–figure supplement 1

Supplement: supp [file elife-41028-supp-v2.zip]
